# Supplementary material
Source: HighWire-hosted journal article supplement (http://asnr-client.stage.highwire.org/highwire/filestream/181891/field_highwire_adjunct_files/0/3591_figures.pdf)
Supplement: 3591_figures.pdf [file 3591_figures.pdf]

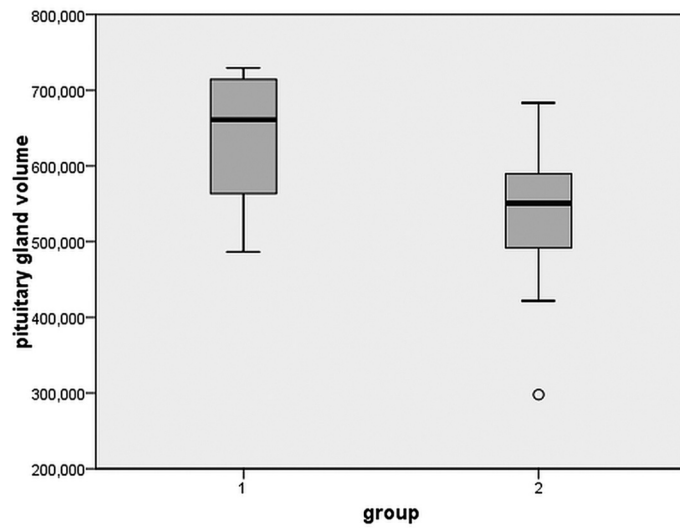

**ON-LINE FIG 1.** Pituitary gland volume of group 1 (patients with Kennedy disease) and group 2 (healthy control subjects).

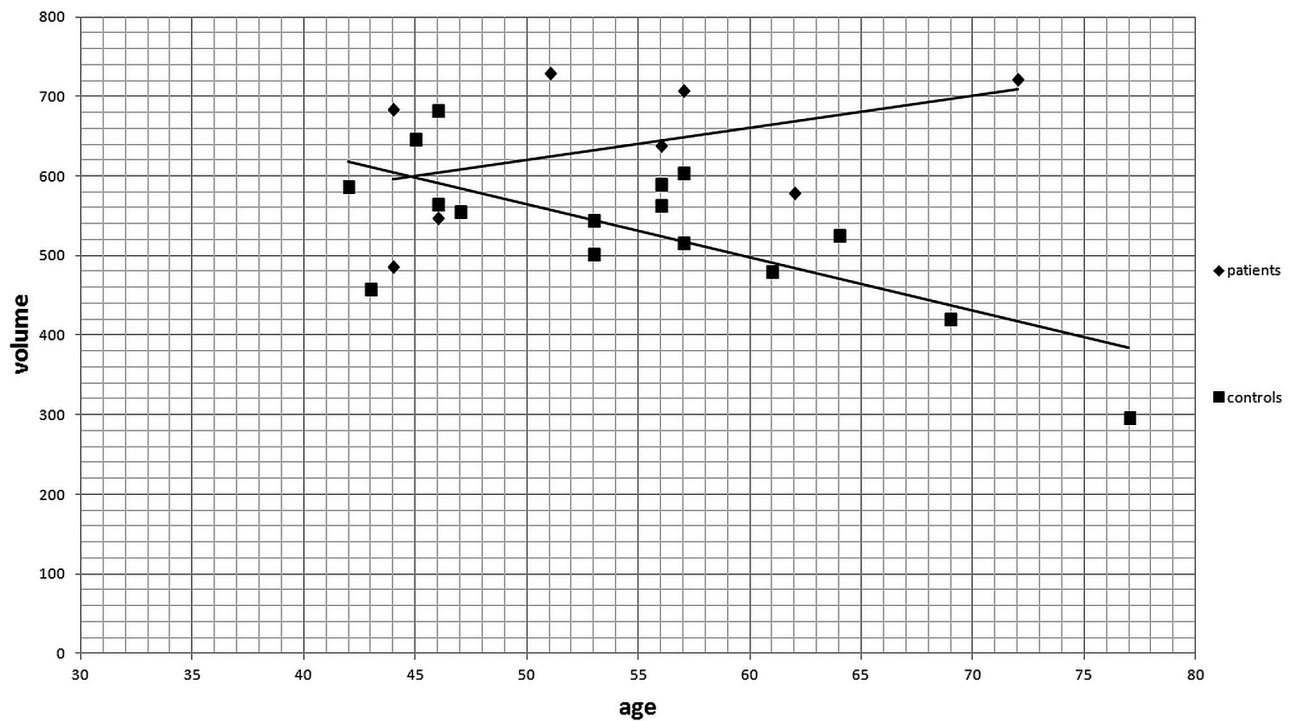

**ON-LINE FIG 2.** Correlation between pituitary gland volume and age.

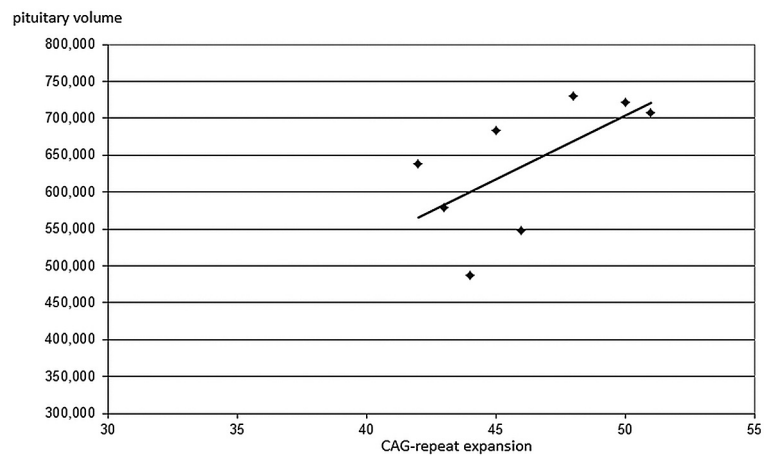

**ON-LINE FIG 3.** Correlation between pituitary gland volume and CAG repeat expansion length.
